# Supplementary material for: Development of Certified Reference Materials for the Determination of Apparent Amylose Content in Rice
Source: MDPI journal article supplement (doi:10.3390/molecules27144647), 2022-07-21
Supplement: s1 [file s1]

## Development of certified reference materials for the determination of apparent amylose content in rice

Supplementary Table S1. Moisture content (%) of the four rice reference materials for five replicates

| Samples | 1     | 2     | 3     | 4     | 5     | Mean $\pm$ SD    |
|---------|-------|-------|-------|-------|-------|------------------|
| RM01    | 10.56 | 10.44 | 10.45 | 10.54 | 10.44 | 10.49 $\pm$ 0.06 |
| RM02    | 11.30 | 11.40 | 11.36 | 11.37 | 11.34 | 11.35 $\pm$ 0.04 |
| RM03    | 10.92 | 10.88 | 10.87 | 10.85 | 10.91 | 10.89 $\pm$ 0.03 |
| RM04    | 9.82  | 9.71  | 9.81  | 9.77  | 9.77  | 9.78 $\pm$ 0.04  |

Supplementary Table S2. The iodine binding capacity of the stock potato amylose

| No. | $V$ (mL) | $m$ (mg) | $\omega_m$ (%) | $x$ (%) | $m \pm sd$       |
|-----|----------|----------|----------------|---------|------------------|
| 1   | 1.139    | 5.0      | 10.18          | 19.30   |                  |
| 2   | 1.140    | 5.0      | 10.18          | 19.31   | 19.28 $\pm$ 0.04 |
| 3   | 1.136    | 5.0      | 10.18          | 19.25   |                  |

The iodine binding capacity of the stock potato amylose was shown as mean ( $m$ )  $\pm$  standard deviation ( $sd$ ) ( $n=3$ ), and calculated as follows:

$$x = \frac{0.7610}{m(1 - \omega_m)} \times V \times 100$$

where

$x$  is the iodine binding capacity;

$m$  is the mass of potato amylose;

$\omega_m$  is the moisture content of the potato amylose;

$V$  is the volume of stock potassium iodate solution needed to titrate the amylose solution;

0.7610 is a factor to allow for 1 mL of stock potassium iodate solution being equivalent to 0.7610 mg of iodine.

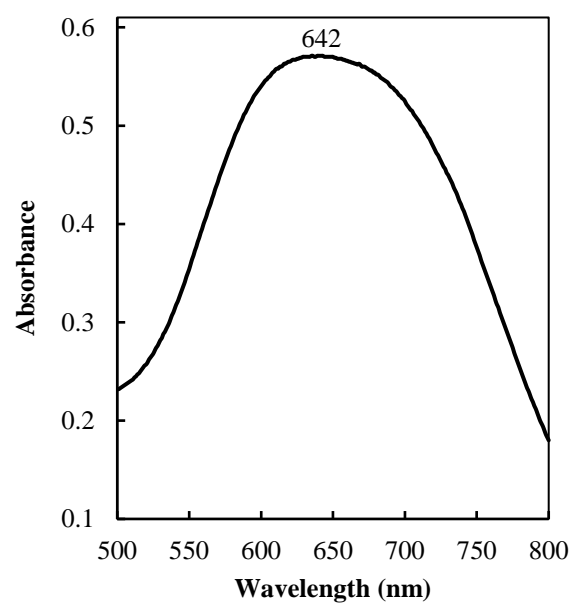

Supplementary Figure S1. The maximum absorbance of the iodine-starch complex of potato amylose standard
